# Supplementary material
Source: Springer Nature journal article supplement (https://www.springermedizin.de/resource/supplementary/12990_2013_598_MOESM17_ESM.pdf/9613590)

# Suppl. Fig. 2

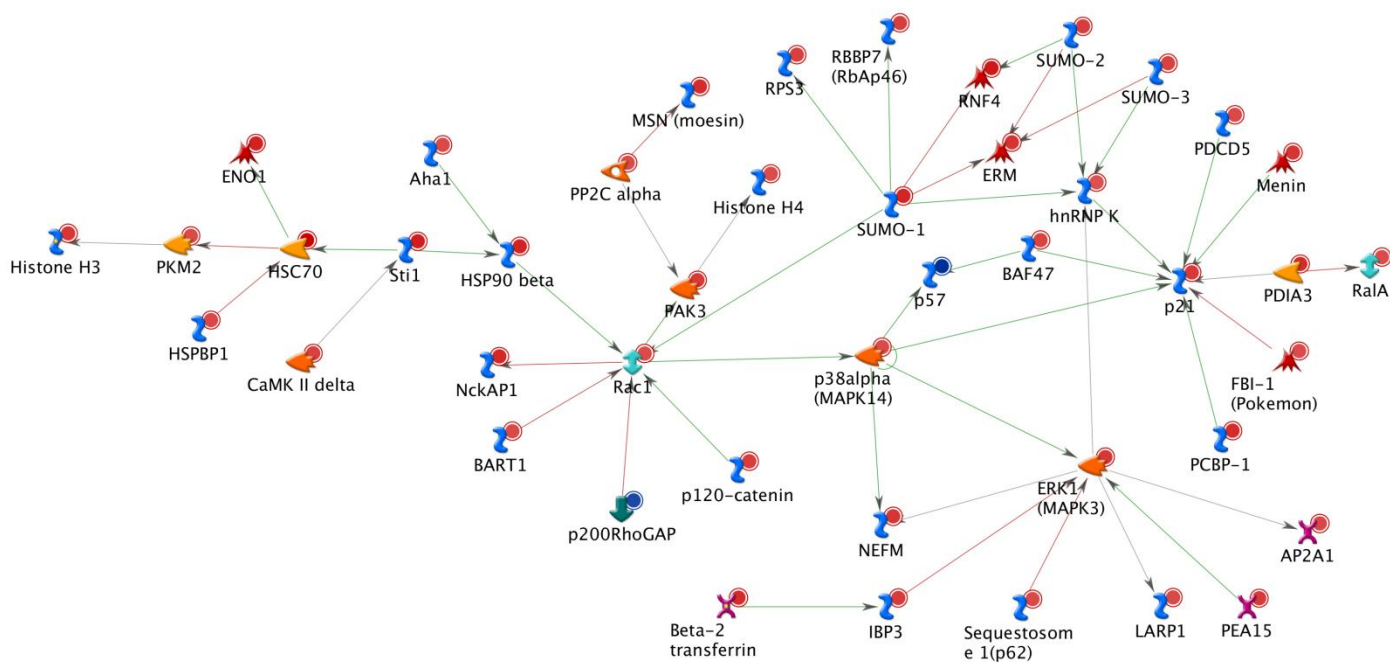

Supplement: MOESM17 [file 9613590]
